# Supplementary material
Source: Research Square preprint supplement (doi:10.21203/rs.3.rs-8801993/v1)
Supplement: Supplementary file 1 [file 85abb9afc55208b7edd172d9.docx]

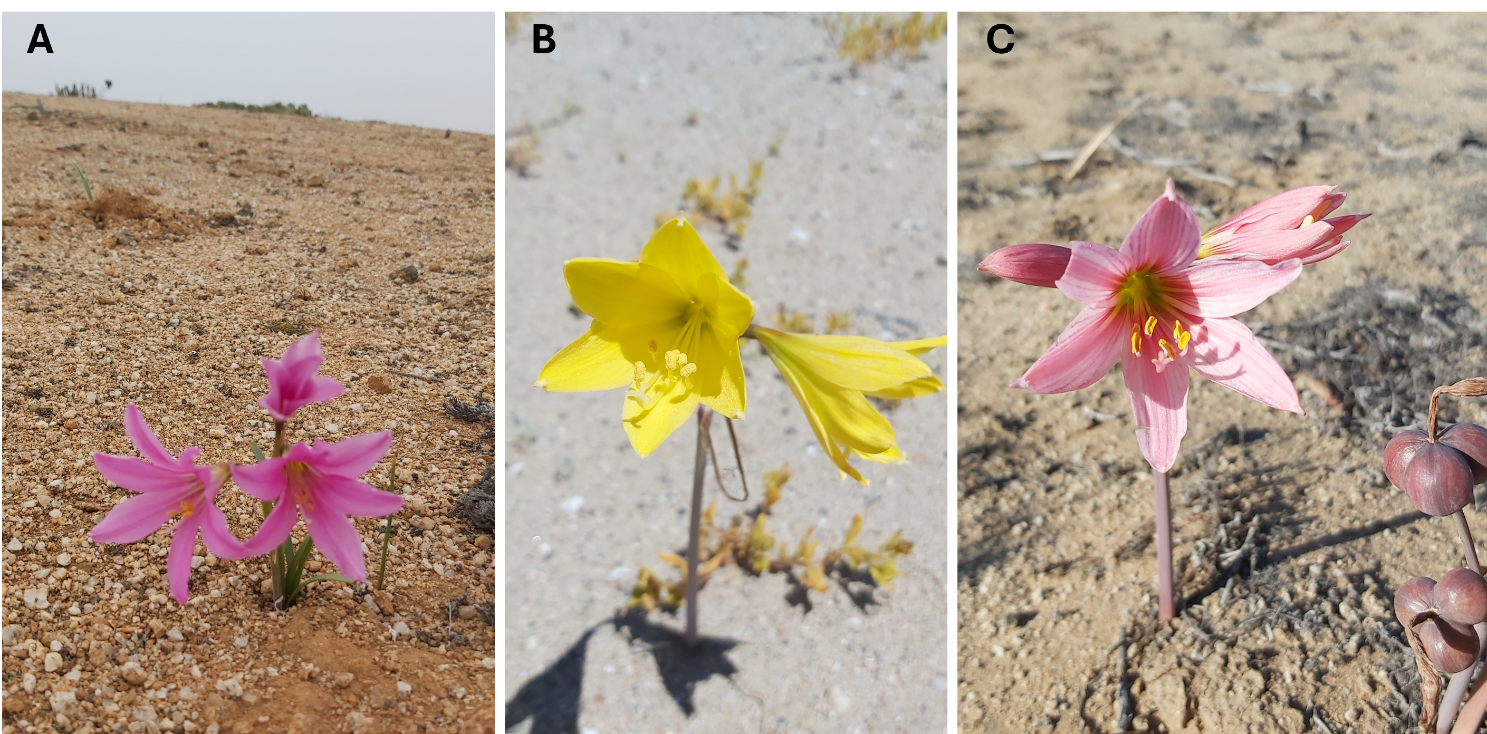


**Figure S1. Representative flowering individuals of three geophytic species from the Atacama Desert.** (A) Paposoa laeta from Pan de Azúcar National Park (Chañaral), (B) Zephyranthes bagnoldii from Pampa Caracoles (Caldera), and (C) Zephyranthes sarae from Freirina, Chile.
