# Supplementary material
Source: Research Square preprint supplement (doi:10.21203/rs.3.rs-8801993/v1)
Supplement: Supplementary file 2 [file be5368f3c70e22f5eee07e9c.docx]

**Table S1**. Taxa used in this study, plastome accessions, vouchers, and associated publications.

| **Taxon** | **GenBank accession** | **Herbarium voucher** | **References** |
| --- | --- | --- | --- |
| *Paposoa laeta* | PV890573 | EIF14530 | This study |
| *Zephyranthes bagnoldii* | PV849990 | EIF14564 | This study |
| *Zephyranthes sarae* | PV890574 | EIF14549 | This study |
| *Zephyranthes phycelloides* | MW348956.1 | EIF14539 | Contreras-Díaz et al. 2021 |
| *Zephyranthes mesochloa* | MT323238.1 | Not reported | Namgung et al. 2021 |
| *Zephyranthes candida* | MW406476.1 | Not reported | Unpublished |
| *Hippeastrum vittatum* | MT762362.1 | ZITP2019830 | Li et al. 2020 |
| *Hippeastrum reticulatum* | MT701523.1 | Not reported | Liu et al. 2022 |
| *Hippeastrum albertii* | MT701522.1 | Not reported | Liu et al. 2022 |
| *Hippeastrum rutilum* | MT133568.1 | Not reported | Huang et al. 2020 |

EIF: Index Herbariorum of Universidad de Chile
